# Supplementary material
Source: PubMed Central journal article supplement (PMC6348114)
Supplement: NIHMS1516198-supplement-1.pdf [file NIHMS1516198-supplement-1.pdf]

**Supplementary Table 1:** Significant predictors of negative symptoms at baseline, 6 months, and 12 months in individuals at clinical high risk for psychosis.

|          |           | Adjusted R <sup>2</sup> | predictor | beta       | Uncorrected p | Corrected p |        |
|----------|-----------|-------------------------|-----------|------------|---------------|-------------|--------|
| Baseline | N1        | 0.105                   | CDSS      | 0.364      | 0.037         | 0.044       |        |
|          | N2        | 0.366                   | CDSS      | 0.484      | 0.004         | 0.01*       |        |
|          | N3        |                         | ---       |            |               |             |        |
|          | N4        | 0.225                   | Age       | 0.499      | 0.003         | 0.008*      |        |
|          | N5        | 0.207                   | IL-1RA    | -0.409     | 0.016         | 0.025       |        |
|          |           |                         | IL-1beta  | -0.382     | 0.024         | 0.033       |        |
| N6       | 0.090     | CDSS                    | 0.344     | 0.05       | 0.05          |             |        |
|          | N_total   | 0.293                   | CDSS      | 0.561      | 0.001         | 0.003*      |        |
| 6 Month  | N1        | 0.605                   | N1_BL     | 0.579      | 0.000         | 0.000*      |        |
|          |           |                         | CDSS_BL   | 0.360      | 0.014         | 0.023       |        |
|          |           |                         | IL-8      | -0.319     | 0.018         | 0.027       |        |
|          | N2        | 0.443                   | N2_BL     | 0.678      | 0.000         | 0.000*      |        |
|          | N3        | 0.392                   | N3_BL     | 0.641      | 0.000         | 0.000*      |        |
|          | N4        | 0.506                   | N4_BL     | 0.669      | 0.000         | 0.000*      |        |
|          |           |                         | TNF       | 0.336      | 0.012         | 0.022       |        |
|          |           |                         | IL-6      | -0.265     | 0.043         | 0.046       |        |
|          | N5        | 0.395                   | N5_BL     | 0.547      | 0.000         | 0.000*      |        |
|          |           |                         | IL-8      | -0.387     | 0.009         | 0.018       |        |
|          |           |                         | Race      | 0.297      | 0.042         | 0.046       |        |
|          | N6        | 0.405                   | N6_BL     | 0.629      | 0.000         | 0.000*      |        |
|          |           |                         | Age       | -0.537     | 0.005         | 0.011       |        |
|          |           |                         | IL-1beta  | 0.341      | 0.041         | 0.046       |        |
|          |           | N_total                 | 0.682     | N_total_BL | 0.966         | 0.000       | 0.000* |
|          |           |                         |           | CDSS_BL    | -0.293        | 0.021       | 0.03   |
|          | 12 Months | N1                      | 0.360     | N1_BL      | 0.585         | 0.000       | 0.000* |
|          |           |                         |           | IFN-g      | 0.395         | 0.016       | 0.025  |
| IL-1beta |           |                         |           | -0.442     | 0.008         | 0.017       |        |
| N2       |           | 0.283                   | N2_BL     | 0.357      | 0.025         | 0.033       |        |
|          |           |                         | IL-10     | 0.349      | 0.043         | 0.046       |        |
|          |           |                         | IL-8      | -0.353     | 0.044         | 0.046       |        |
| N3       |           | 0.477                   | N3_BL     | 0.702      | 0.000         | 0.000*      |        |
| N4       |           | 0.549                   | N4_BL     | 0.636      | 0.000         | 0.000*      |        |
|          |           |                         | TNF       | 0.418      | 0.002         | 0.006*      |        |
|          |           |                         | IL-6      | -0.393     | 0.004         | 0.01*       |        |
| N5       |           | 0.580                   | IL-10     | 0.287      | 0.032         | 0.04        |        |
|          |           |                         | N5_BL     | 0.701      | 0.000         | 0.000*      |        |
|          |           |                         | IL-4      | -0.257     | 0.034         | 0.042       |        |
| N6       |           | 0.352                   | N6_BL     | 0.499      | 0.002         | 0.006*      |        |
|          |           |                         | IL-10     | 0.446      | 0.012         | 0.022       |        |
|          |           |                         | IL-6      | -0.356     | 0.025         | 0.033       |        |
|          |           |                         |           | Sex        | 0.328         | 0.045       | 0.046  |
|          |           | N_total                 | 0.581     | N_total_BL | 0.886         | 0.000       | 0.000* |

|  |  |  |         |        |       |       |
|--|--|--|---------|--------|-------|-------|
|  |  |  | CDSS_BL | -0.407 | 0.011 | 0.022 |
|  |  |  | TNF     | 0.313  | 0.013 | 0.022 |

N1: social isolation or withdrawal ; N2: avolition ; N3: decreased expression of emotion; N4: decreased experience of emotions and self; N5: decreased ideational richness; N6: deterioration in role functioning; N\_total: Total Negative Symptoms Score; BL: Baseline; CDSS: Calgary Depression Scale for Schizophrenia; IL-1RA: interleukin 1 receptor antagonist; IL-1 beta: interleukin 1 beta; IL-8: interleukin 8; IFN-g: interferon gamma; IL-10: interleukin 10; TNF: tumor necrosis factor; IL-6: interleukin 6; IL-4: interleukin 4; *Beta* denotes the standardized score estimate.

\*Corrected p value significant based on Benjamini Hochberg procedure for determination of significant (false discovery rate = 0.01).
